# Supplementary material for: Recapitulation of hepatitis B virus–host interactions in liver organoids from human induced pluripotent stem cells
Source: PubMed Central journal article supplement — eBioMedicine. 2018 Aug 16;35:114–23. doi: 10.1016/j.ebiom.2018.08.014 (PMC6156717; doi:10.1016/j.ebiom.2018.08.014), 2018-08-16
Supplement: mmc3.pdf [file mmc3.pdf]

# Supplementary information, Figure S1

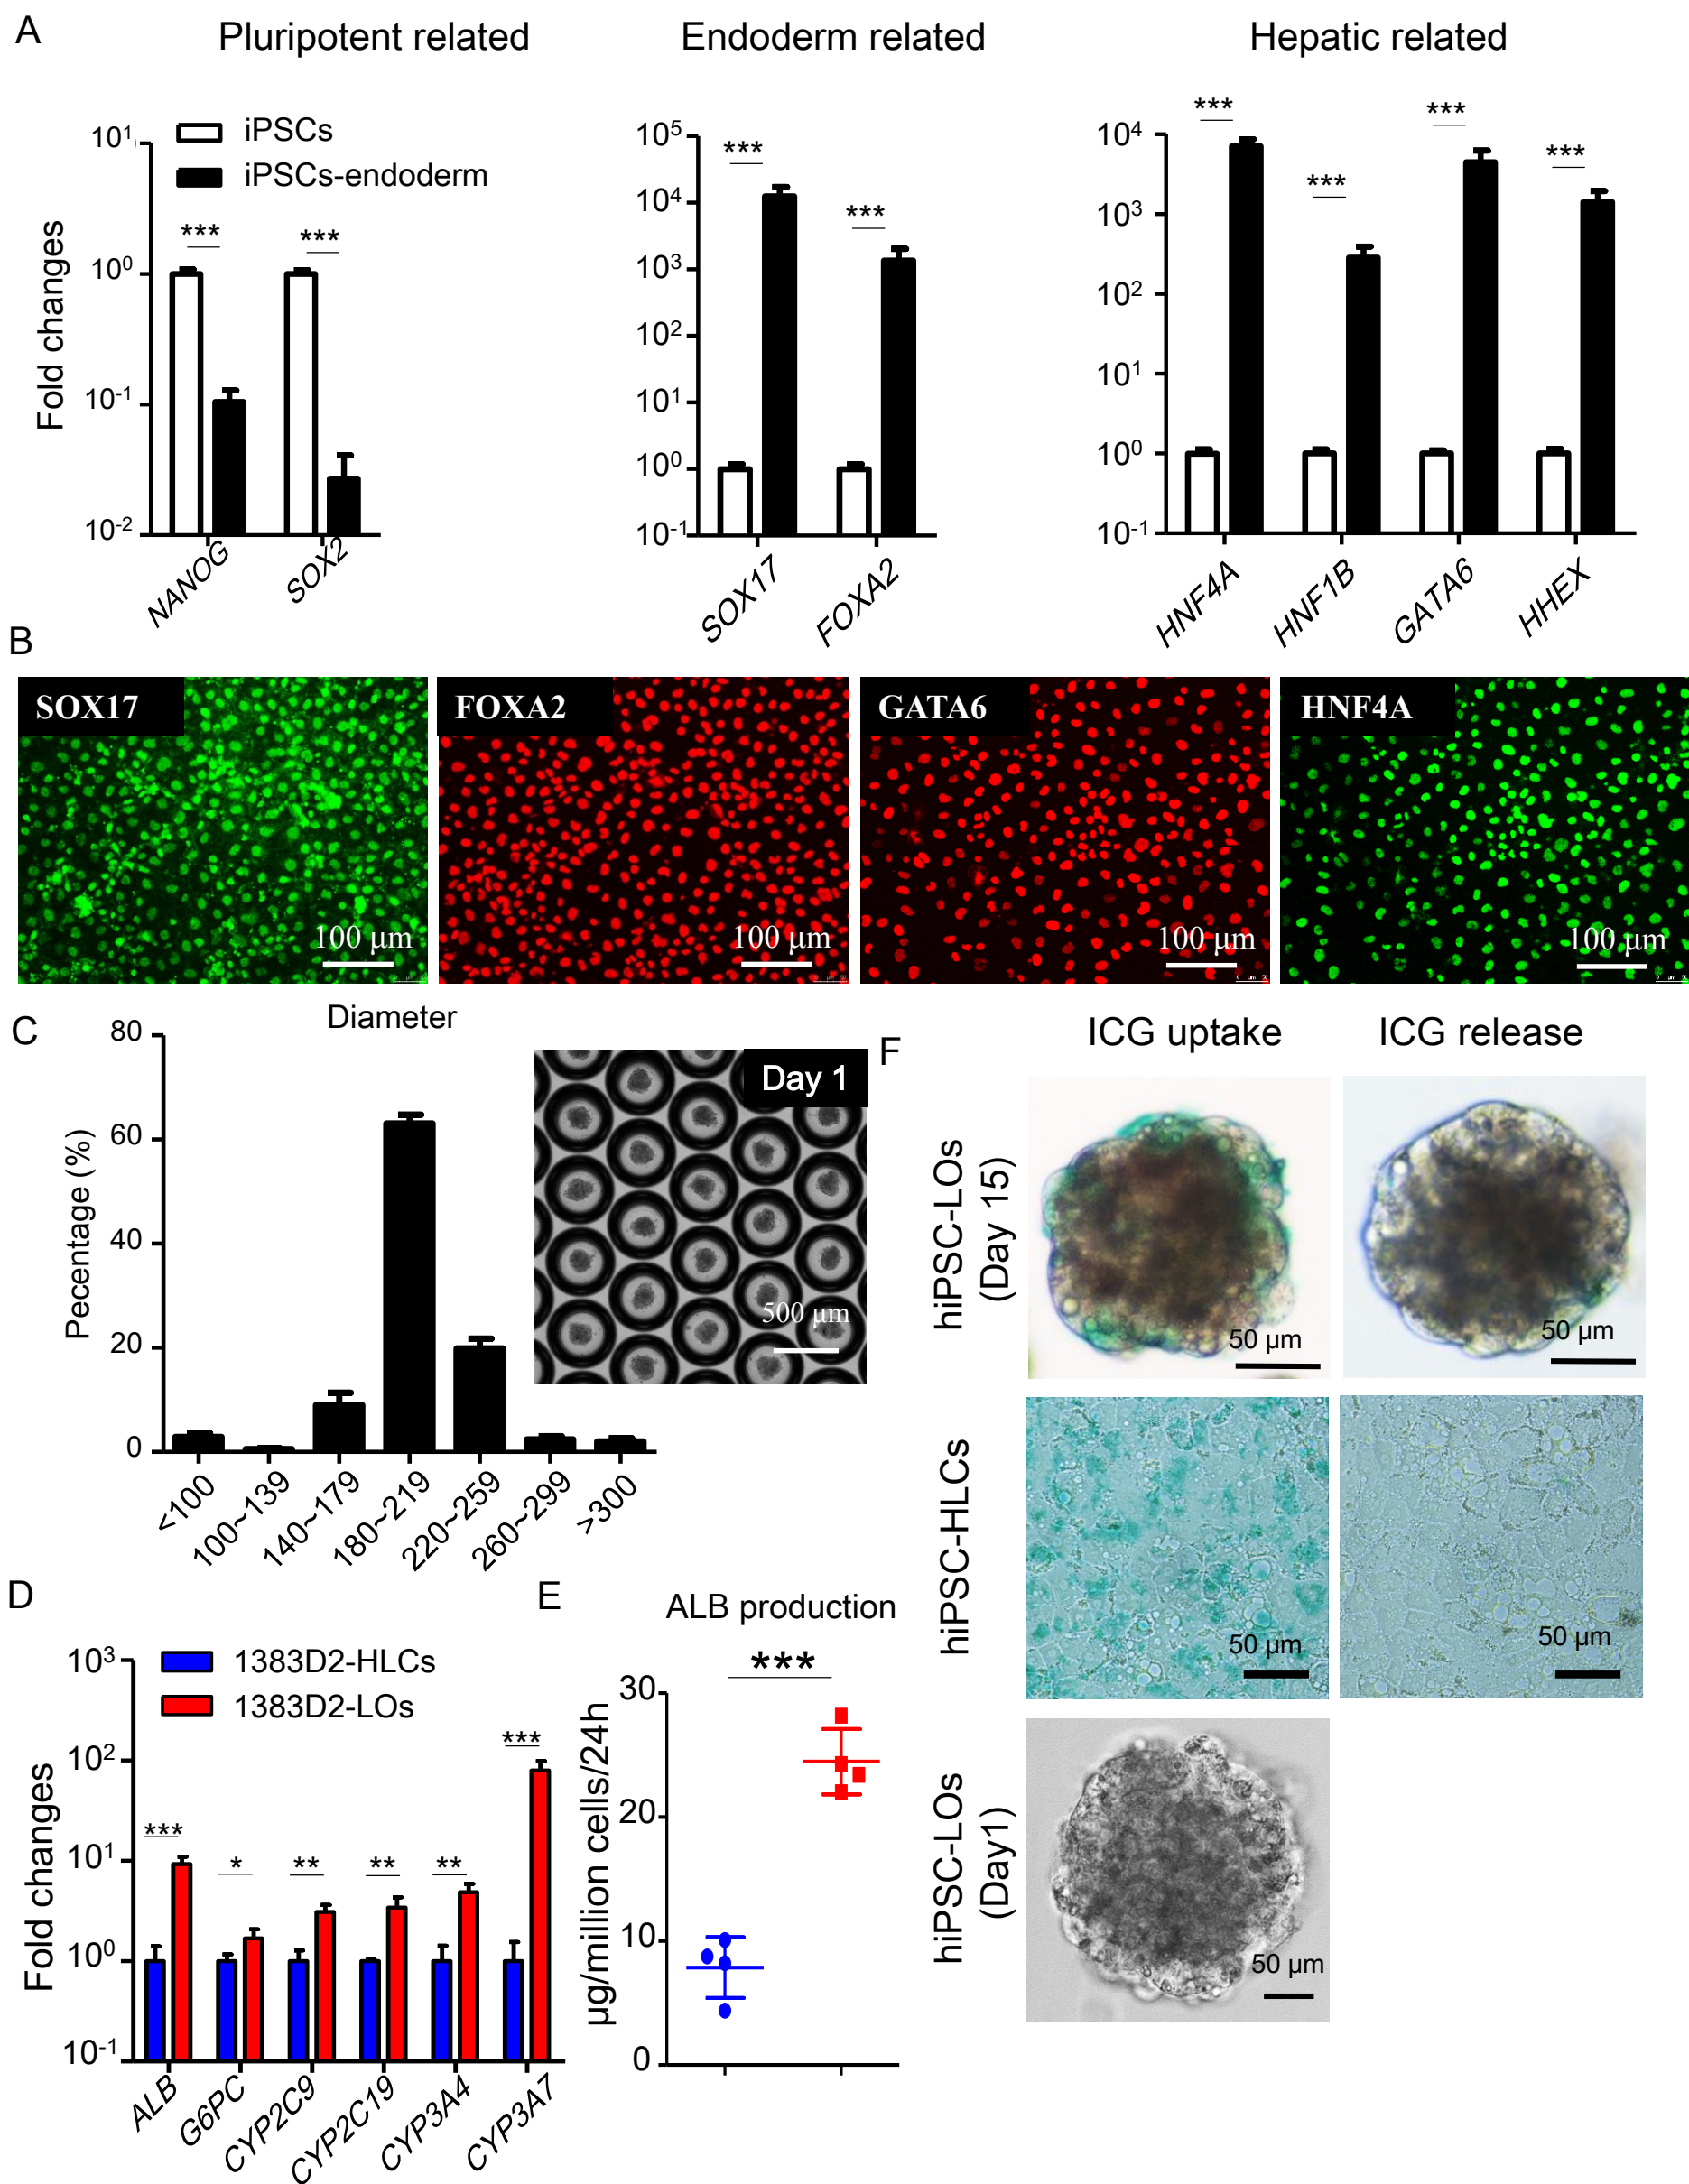

## Supplementary information, Figure S1. In vitro generation and characteristic of functional liver organoids from hiPSCs

(A) Q-PCR Quantification of pluripotency genes (NANOG and SOX2), endoderm genes (*SOX17* and *FOXA2*), and hepatic genes (*HNF4*, *HNF1B*, *GATA6* and *HHEX*) in hiPSCs ( $n = 6$ ) and hiPSC endoderm ( $n = 4$ ). (B) Immunostaining of hiPSC-endoderm with *SOX17*, *FOXA2*, *GATA6* and *HNF4A*; Scale bar, 100  $\mu\text{m}$ . (C) Morphology and diameters of hiPSC-LOs after 24 h of culture in a 3D microwell plate; Scale bar, 500  $\mu\text{m}$ . (D) Q-PCR analysis expression of hepatic genes: *ALB*, *G6PC*, *CYP2C9*, *CYP2C19*, *CYP3A4* and *CYP3A7* in 1383D2-HLCs ( $n = 4$ ) and 1383D2-LOs ( $n = 4$ ). (E) ELISA for ALB secretion of 1383D2-HLCs ( $n = 4$ ) and differentiated 1383D2-LOs ( $n = 4$ ). (F) Indocyanine green uptake (left) and release (right) in hiPSC-LOs (Day 15), hiPSC-HLCs (positive control) and hiPSC-LOs (Day 1, negative control). Scale bar, 50  $\mu\text{m}$ . \* $p < 0.05$ , \*\* $p < 0.01$ , \*\*\* $p < 0.001$ .

Supplementary Information, Figure S2

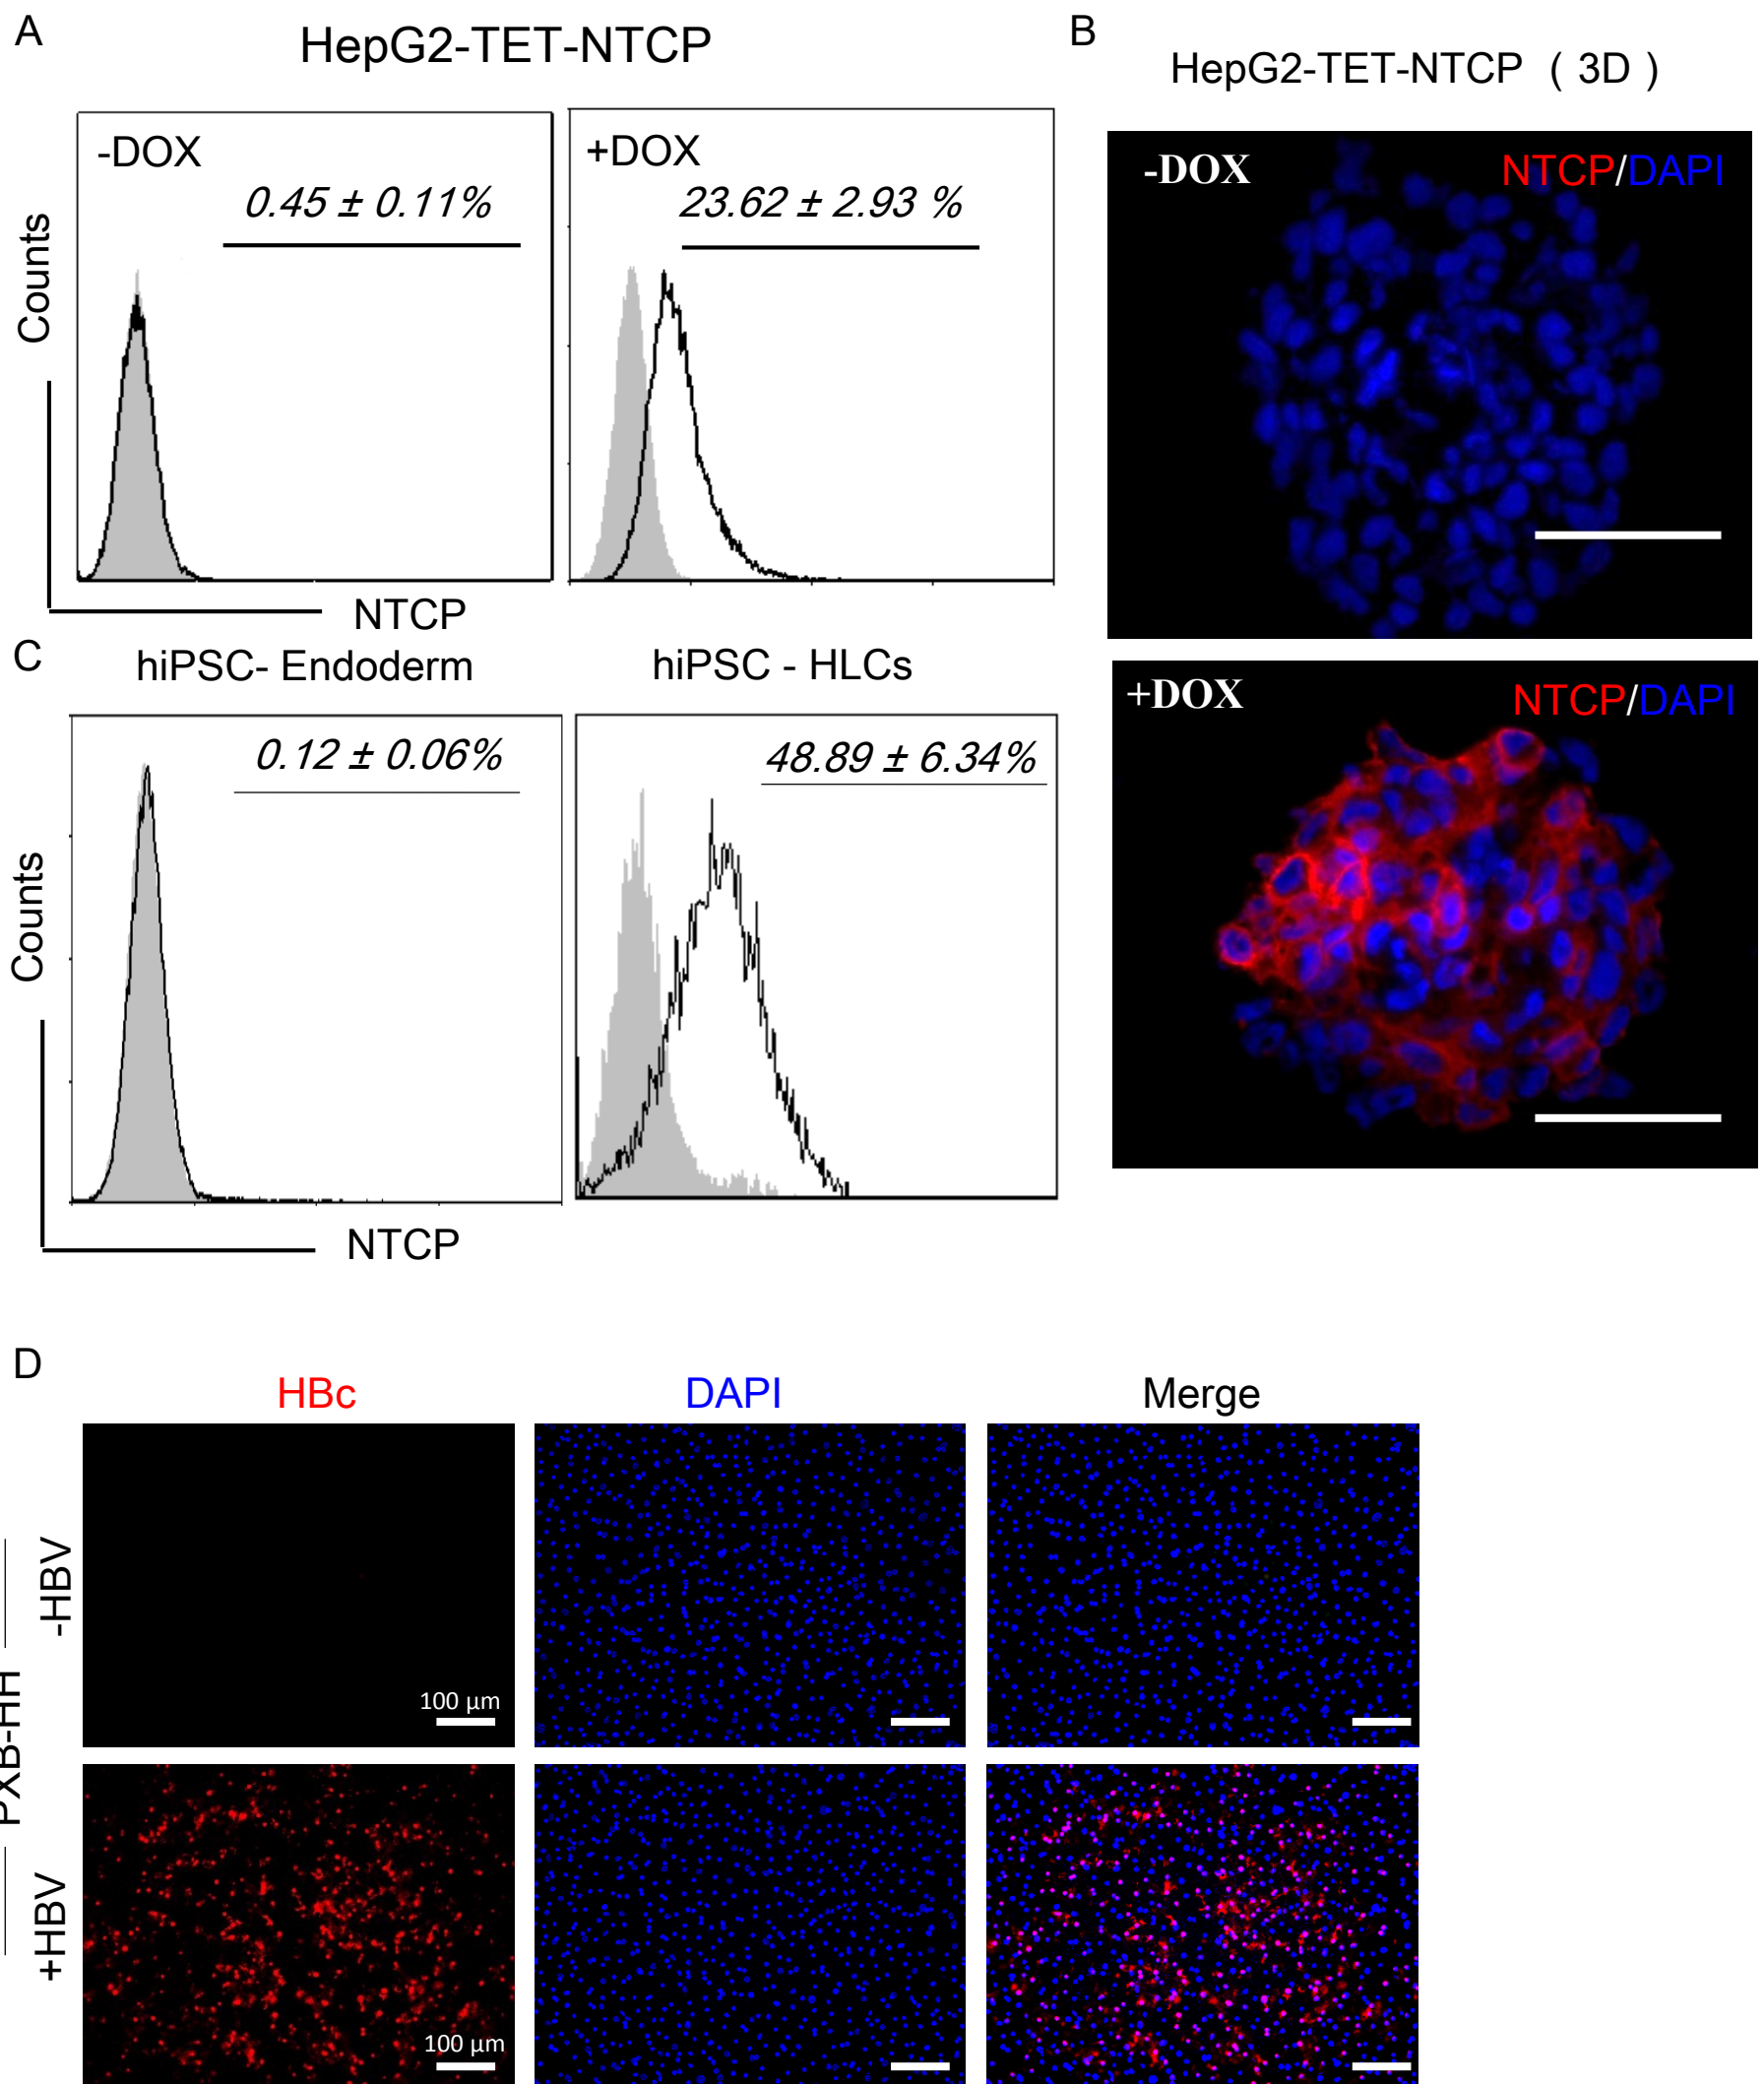

**Supplementary Information, Figure S2, Quality of anti-NTCP antibody and anti-HBc antibody with positive controls.**

(A) Flow cytometry analysis of surface NTCP expression in HepG2-TET-NTCP cells with or without DOX induction ( $n = 4$ ). (B) Immunostaining of NTCP in HepG2-TET-NTCP organoids with or without DOX induction. (C) Flow cytometry analysis of surface NTCP expression in hiPSC-endoderm and hiPSC-HLCs ( $n = 4$ ). (D) Immunostaining of HBc in PXB-HH infected with HBV at 500GEq/cells. Scale bar: 100 $\mu$ m.



## Supplementary Information, Figure S3

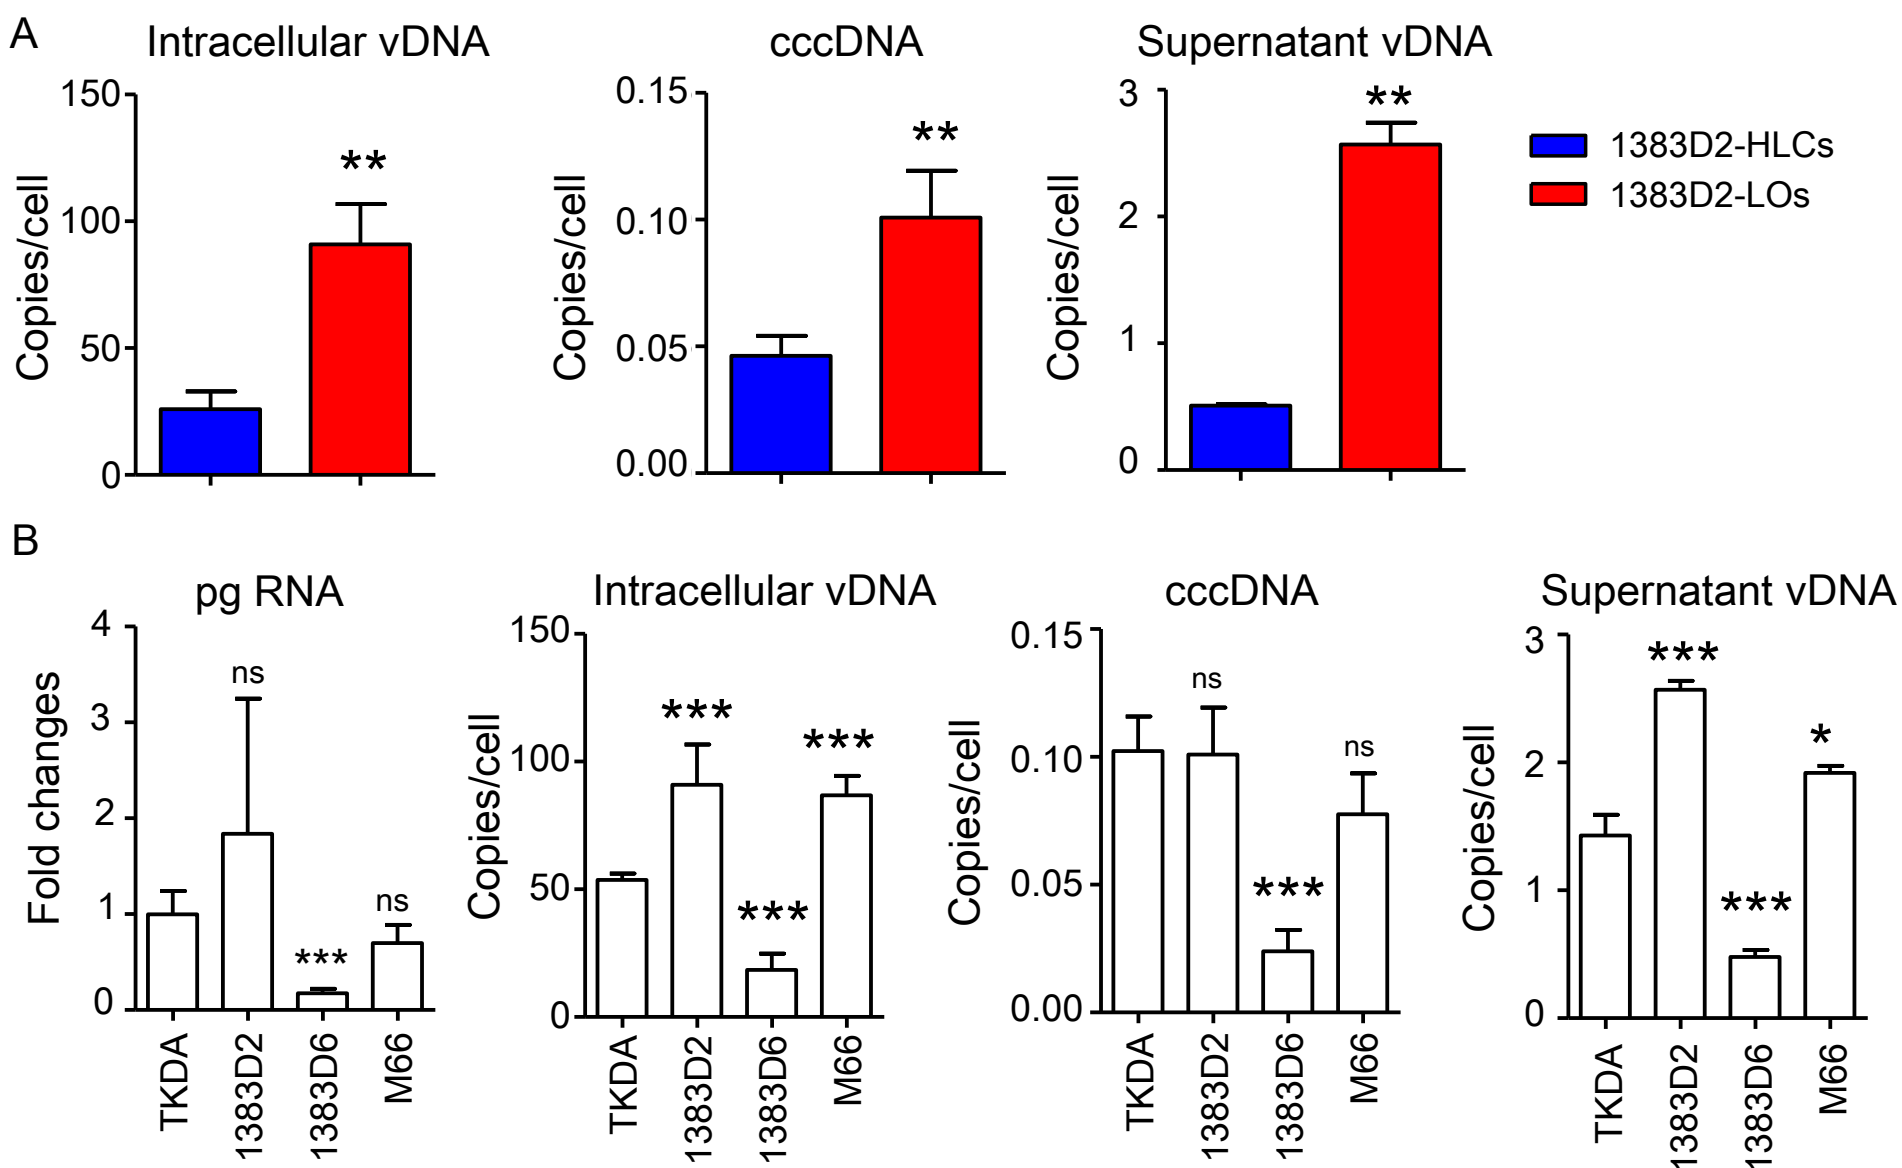

### Supplementary Information, Figure S3. Susceptibility of different hiPSC-derived liver organoids to HBV infection

(A) Q-PCR quantification of intracellular vDNA, cccDNA, and supernatant vDNA in 1383D2-HLCs ( $n = 4$ ), and 1383D2-LOs ( $n = 6$ ) infected with HBV at 500GEq/cell.

(B) Q-PCR quantification of HBV pgRNA, intracellular vDNA, cccDNA, and supernatant vDNA in TKDA-LOs ( $n = 8$ ), and 1383D2-LOs ( $n = 6$ ), 1383D6-LOs ( $n = 6$ ) and M66-LOs ( $n = 6$ ) infected with HBV at 500GEq/cell.

Supplementary information, Figure S4

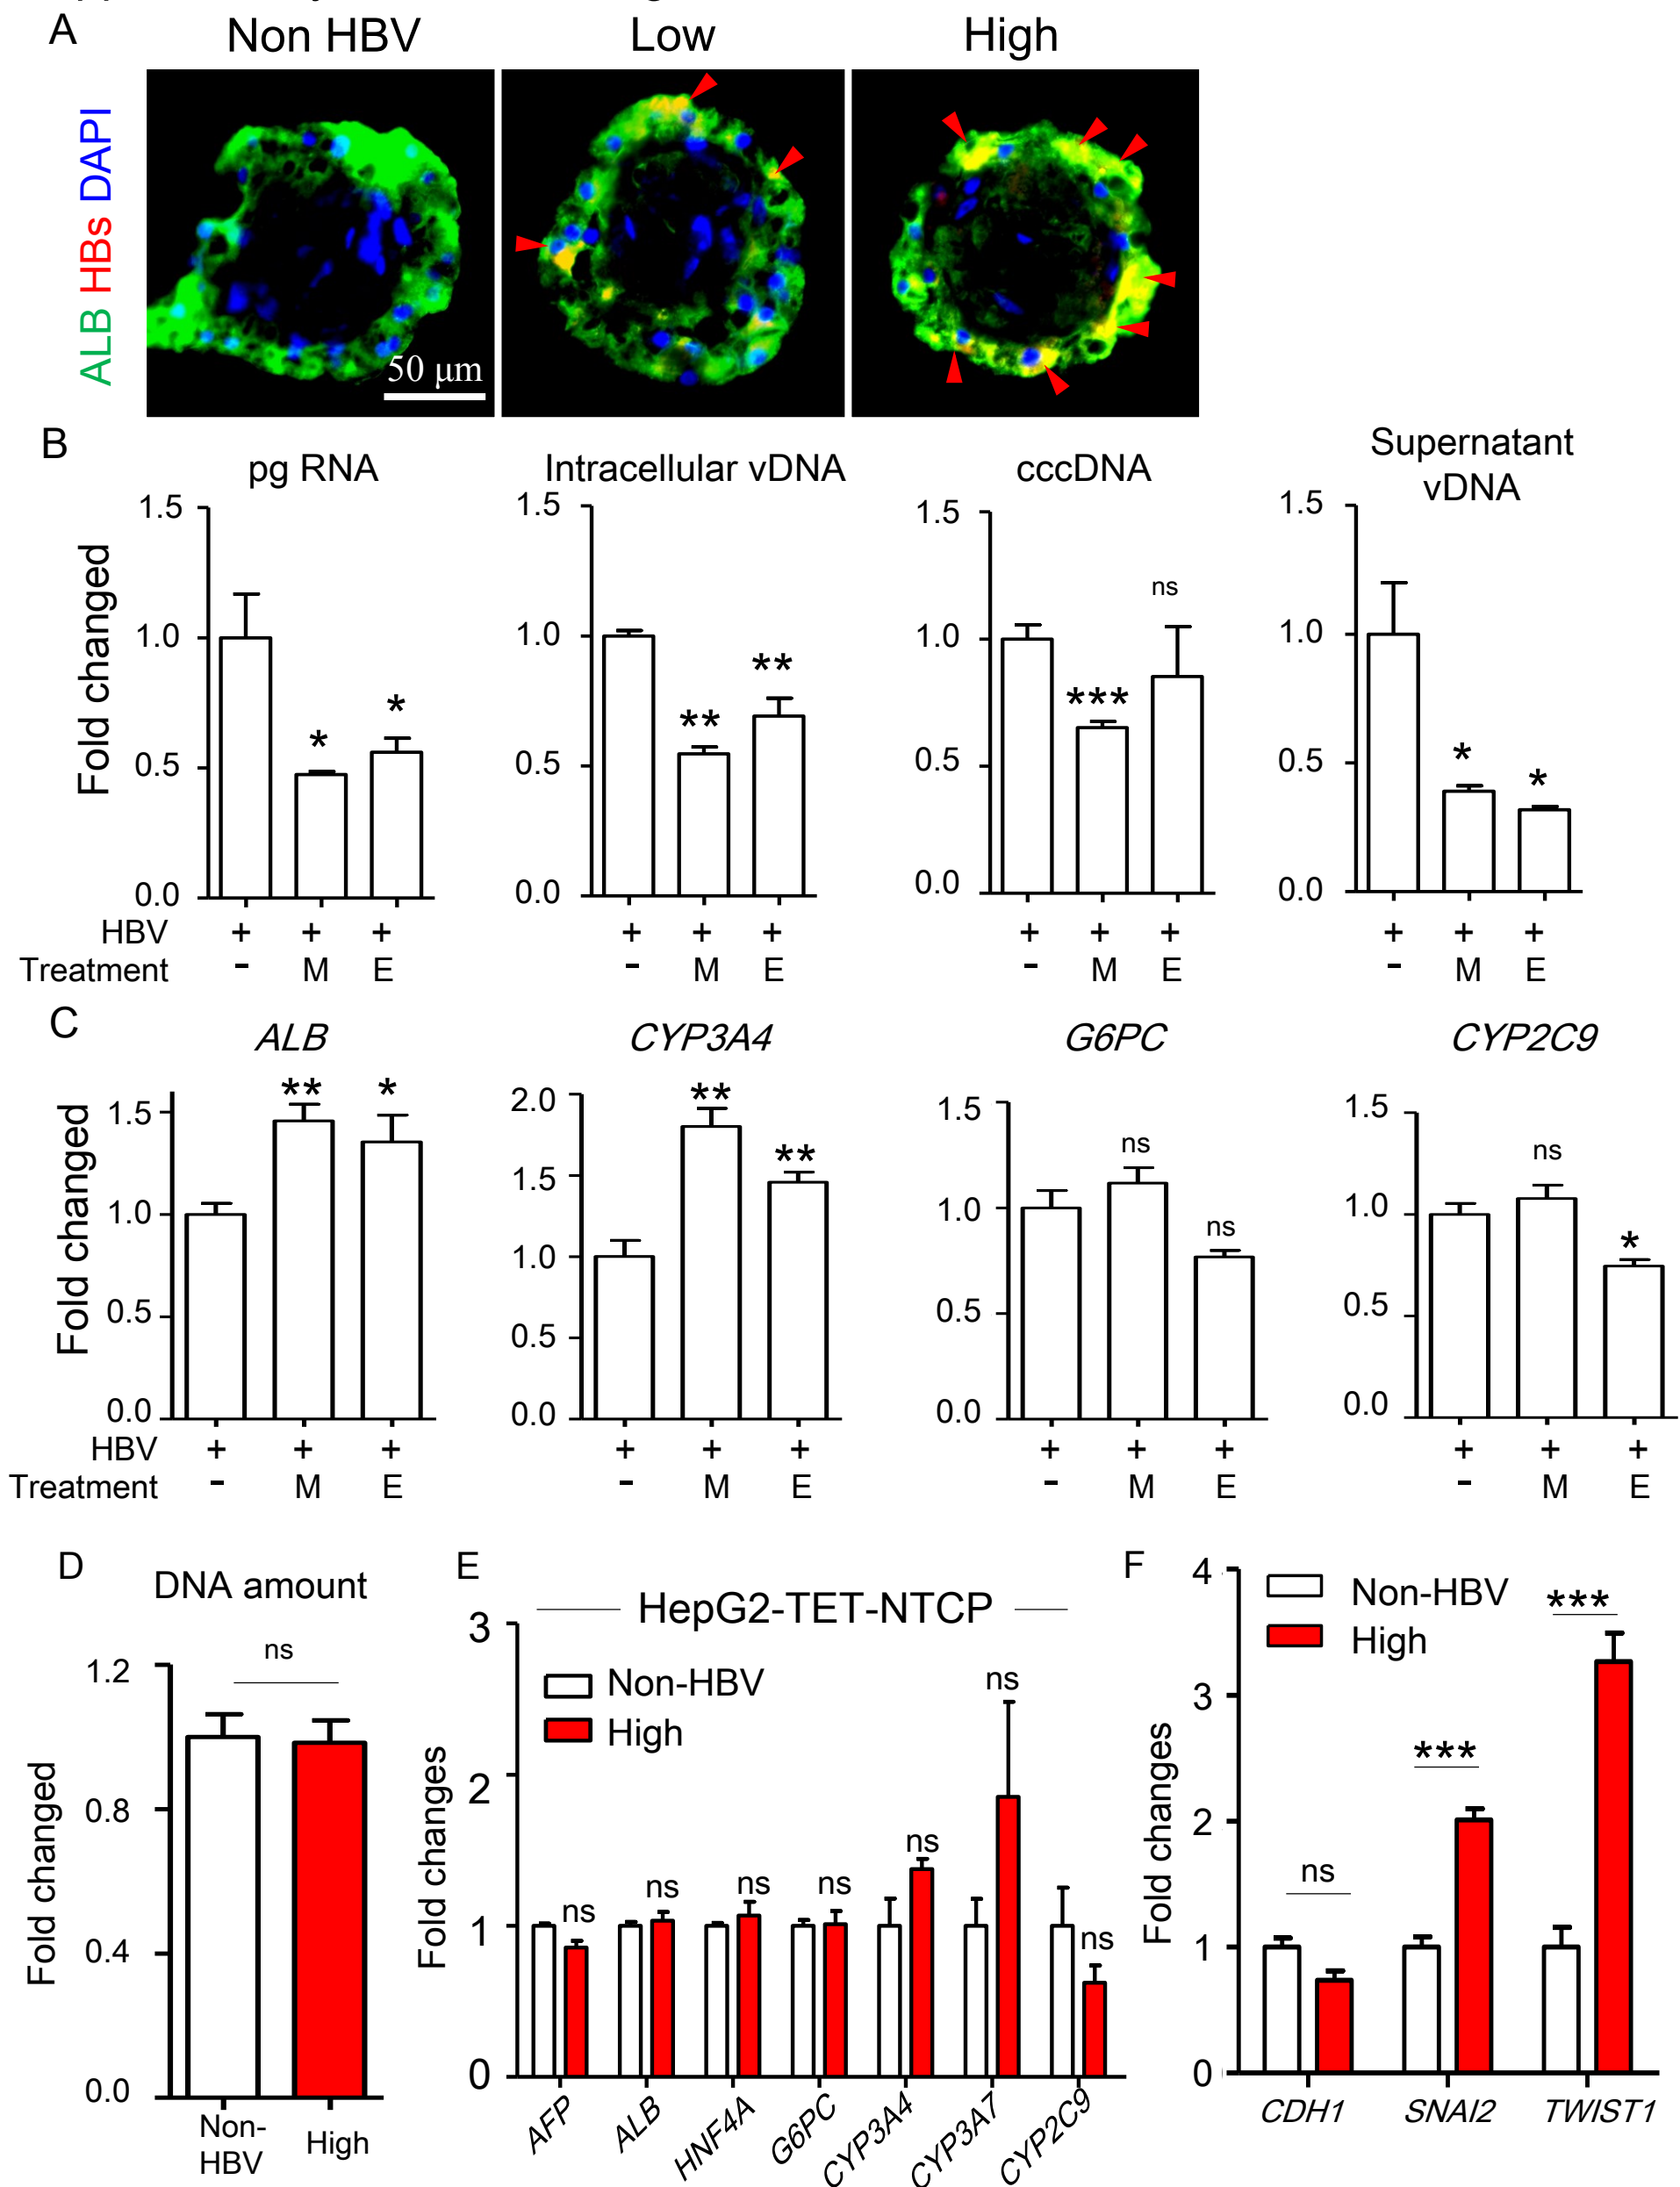

**Supplementary information, Figure S4. HBV infection in hiPSC-LOs and HepG2-Tet-NTCP organoids.**

(A) Immunofluorescence analysis of HBs and ALB in hiPSC-LOs at doses of 0 (Non-HBV), 500 (low dose), and 5,000 (high dose) GEq/cell infection. (B) Q-PCR quantification of HBV pg RNA, intracellular vDNA, cccDNA, supernatant vDNA in high-dose HBV infected hiPSC-LOs with Myrcludex (M,  $n = 4$ ) and Entecavir (E,  $n = 4$ ) treatment; no treated infected hiPSC-LOs as a control. (C) Q-PCR quantification of *ALB*, *CYP3A4*, *G6PC*, and *CYP2C9* in high-dose HBV infected hiPSC-LOs with Myrcludex (M,  $n = 4$ ) and Entecavir (E,  $n = 4$ ) treatment; no treated infected hiPSC-LOs as a control. (D) The total genome DNA amount in non- and high-dose HBV-infected hiPSC-LOs ( $n = 4$ ). (E) Q-PCR quantification of *AFP*, *ALB*, *HNF4A*, *G6PC*, *CYP3A4*, *CYP3A7*, *CYP2C9* and *CYP2C19* in non-, and high-dose HBV-infected HepG2-TET-NTCP organoids with DOX,  $n = 4$ . (F) Q-PCR analysis of the expression of EMT genes *CDH1*, *SNAI2*, and *TWIST1* in non- and high-dose HBV-infected, hiPSC-LOs,  $n = 4$ . \* $p < 0.05$ , \*\* $p < 0.01$ , \*\*\* $p < 0.001$ ; ns, not significant.

# Supplementary Information, Figure S5

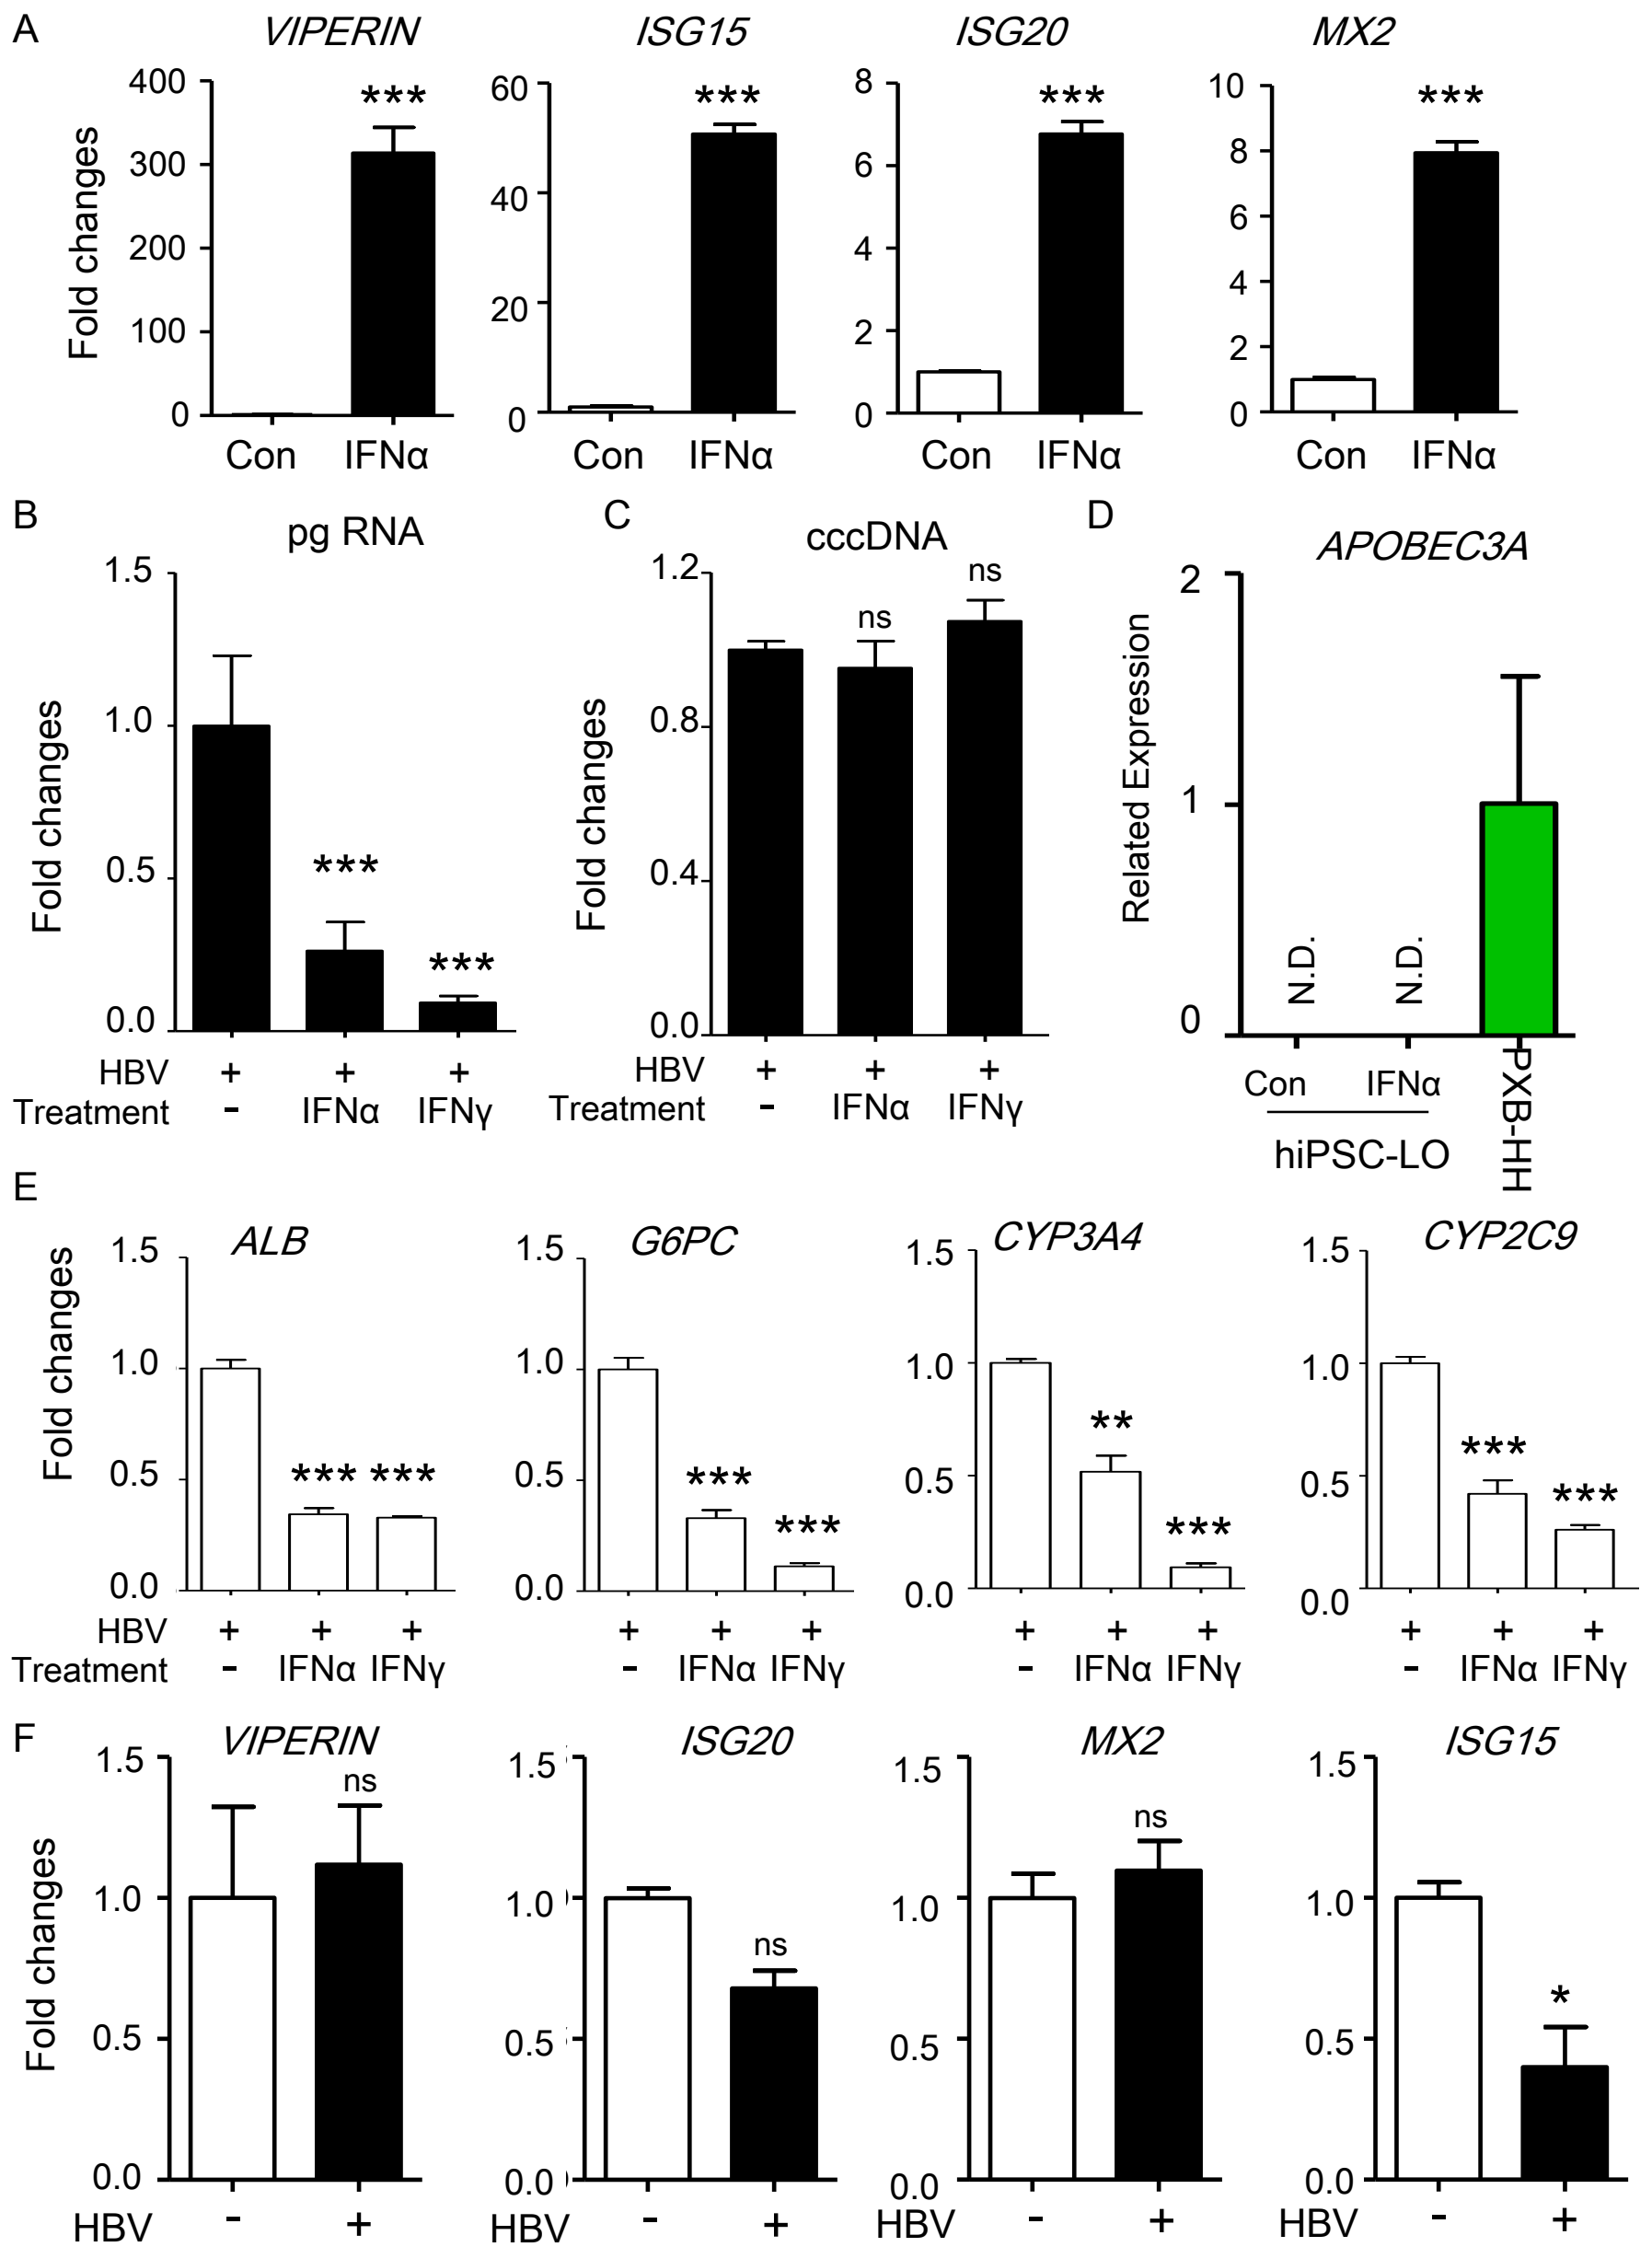



**Supplementary Information, Figure S5. Interferons suppressed virus replication and aggravated hepatic injury in hiPSC-LOs.**

(A) Q-PCR analysis of *VIPERIN*, *ISG15*, *ISG20*, and *MX2* in hiPSC-LOs with IFN $\alpha$  treatment (48h,  $n = 4$ ). (B) Q-PCR quantification of HBV pg RNA in high-dose HBV infected hiPSC-LOs with IFN $\alpha$  and IFN $\gamma$  treatment,  $n = 4$ . (C) Q-PCR quantification of HBV cccDNA in high-dose HBV infected hiPSC-LOs with IFN $\alpha$  and IFN $\gamma$  treatment,  $n = 4$ . (D) Q-PCR analysis of APOBEC3A expression in hiPSC-LOs with or without IFN $\alpha$  treatment, PXB-HHs as a control ( $n = 4$ ). (E) Q-PCR quantification of functional hepatic genes, *ALB*, *G6PC*, *CYP3A4* and *CYP2C19* in high-dose HBV infected hiPSC-LOs with IFN $\alpha$  and IFN $\gamma$  treatment ( $n = 4$ ). (F) Q-PCR analysis of the IFN-stimulated genes *VIPERIN*, *ISG15*, *ISG20*, and *MX2* in non-HBV and high-dose HBV infected hiPSC-LOs. \* $p < 0.05$ , \*\* $p < 0.01$ , \*\*\* $p < 0.001$ ; ns, not significant.
